# Supplementary material
Source: publisher figshare collection journal article supplement (https://sage.figshare.com/ndownloader/files/24087122)
Supplement: Supplementary file 1 [file 24087122]

Appendix A1 – ICD Codes Used in Defining Mental Disorder

| **Mental Disorder** | **ICD-9-CM or ICD-10-CA Codes** |
| --- | --- |
| Mood or Anxiety Disorder | One or more hospitalizations or two or more physician visits with the diagnosis for ICD-9-CM codes 296, 311, 309, 300 or ICD-10-CA codes F30, F31, F32, F33, F34, F38, F40, F41.0, F41.1, F41.2, F41.3, F41.8, F41.9, F42, F43, F53.0 |
| Psychotic Disorder | One or more hospitalizations or one or more physician visits with the diagnosis for ICD-9-CM codes 295, 297, 298 or ICD-10-CA codes F11.5, F12.5, F13.5, F14.5, F15.5, F16.5, F18.5, F19.5, F20, F22, F23, F24, F25, F28, F29 |
| Personality Disorder | One or more hospitalizations or one or more physician visits with the diagnosis for ICD-9-CM code 301 or ICD-10-CA codes F21, F60, F61, F62, F69 |
| Substance Use Disorder | One or more hospitalizations or one or more physician visits with the diagnosis for ICD-9-CM codes 291, 292, 303, 304, 305 or ICD-10-CA codes F10-F19, F55, Z50.2, Z50.3 |

Appendix B1: Criminal Accusation Categories

|  |  |  |
| --- | --- | --- |
| Accusation Category | Legislation Referenced | Specific Criminal Code |
| Administrative | All YCJA, all YOA, CC | CC (1-43, 145, 811, 468-840) |
| Assault | CC | CC (264.1 – 270.1) |
| Drug | All NCA, all CDSA, CC | CC (462.1-462.2) |
| Other | CC | CC (46-83, 118-144, 146-149, 183-209, 463, 465) |
| Property | CC | CC (321-462 and 462.3-462.5) |
| Sexual | CC | CC (150-182, 210-213, and 271-278.91) |
| Violent | CC | CC (83.01-117.11, 214-264 and 279-320.1) |

YCJA – Youth Criminal Justice Act; YOA – Young Offenders Act; CC – Criminal Code of Canada; NCA – Narcotic Control Act; CDSA - Controlled Drugs and Substances Act
